# Supplementary material
Source: PubMed Central journal article supplement (PMC9856880)
Supplement: jama-e2222847-s003.pdf [file jama-e2222847-s003.pdf]

Chang AR, Moore BS, Luo JZ, et al. Exome sequencing of a clinical population for autosomal dominant polycystic kidney disease. *JAMA*. Published December 27, 2022. doi:10.1001/jama.2022.22847

## **Data Sharing Statement**

### **Data**

**Data available:** No
